# Supplementary material
Source: Springer Nature journal article supplement (https://www.springermedizin.de/resource/supplementary/13058_2013_3392_MOESM2_ESM.pdf/9704050)
Supplement: MOESM2 [file 9704050]

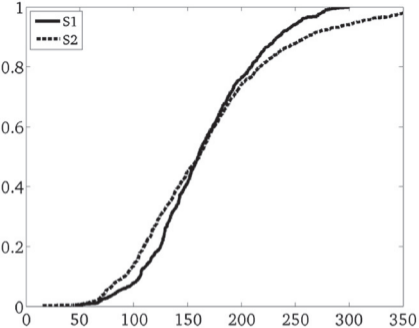

(a) Cumulative distribution of projected breast area in S1 (solid) and S2 (dashed), respectively.

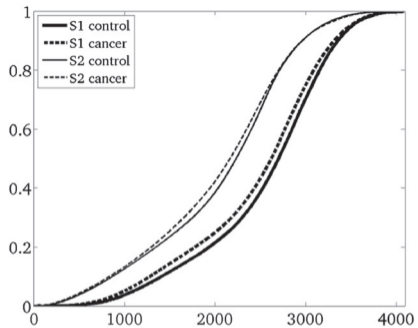

(b) Cumulative intensity distribution in mammograms of controls (solid) and cancers (dashed) for S1 (Thick) and S2 (Thin), respectively.
